# Supplementary material for: How Consistent Are Consumers in Their Decisions? Investigation of Houseplant Purchasing
Source: MDPI journal article supplement (doi:10.3390/bs11050073), 2021-05-12
Supplement: s1 [file s1]

## Supplementary Materials. Tables

Table S1. Levels of each demographic characteristics

| Demographic Characteristic | Level                             | Value |
|----------------------------|-----------------------------------|-------|
| Education                  | Some high school or less          | 1     |
|                            | High school diploma/GED           | 2     |
|                            | Some college courses              | 3     |
|                            | Associate degree                  | 4     |
|                            | Bachelor's degree                 | 5     |
|                            | Some graduate school              | 6     |
|                            | Graduate or professional's degree | 7     |
| Relationship Status        | Not married/single                | 1     |
|                            | In a relationship                 | 2     |
|                            | Married                           | 3     |
|                            | Divorced/separated                | 4     |
|                            | Widowed                           | 5     |
| Annual Income              | Less than \$20,000                | 1     |
|                            | \$20,000 - \$29,999               | 2     |
|                            | \$30,000 - \$39,999               | 3     |
|                            | \$40,000 - \$49,999               | 4     |
|                            | \$50,000 - \$59,999               | 5     |
|                            | \$60,000 - \$69,999               | 6     |
|                            | \$70,000 - \$79,999               | 7     |
|                            | \$80,000 - \$89,999               | 8     |
|                            | \$90,000 - \$99,999               | 9     |
|                            | \$100,000 - \$149,999             | 10    |
|                            | \$150,000 - \$199,999             | 11    |
|                            | Over \$200,000                    | 12    |
| House Type                 | Single-Family Home                | 1     |
|                            | Townhouse                         | 2     |
|                            | Condominium                       | 3     |
|                            | Multi-Family Home                 | 4     |
|                            | Apartment                         | 5     |
|                            | Co-op                             | 6     |
|                            | Ranch Style Home                  | 7     |
|                            | Mobile Home                       | 8     |
| Area of Residency          | Major Town/City                   | 1     |
|                            | Suburban                          | 2     |
|                            | Small Town                        | 3     |
|                            | Rural Area                        | 4     |
| Region                     | Northeast                         | 1     |
|                            | Mid-Atlantic                      | 2     |
|                            | Midwest                           | 3     |
|                            | South                             | 4     |
|                            | Southwest                         | 5     |
|                            | West                              | 6     |
| Number of Houseplants      | None                              | 1     |
|                            | 1                                 | 2     |
|                            | 2-5                               | 3     |
|                            | 6-10                              | 4     |
|                            | 11-15                             | 5     |
|                            | Over 15                           | 6     |
| Plant Purchase Frequency   | Once a week or more               | 1     |
|                            | 2-3 times monthly                 | 2     |
|                            | Once monthly                      | 3     |
|                            | 2-3 times yearly                  | 4     |
|                            | Once yearly                       | 5     |
|                            | Do not purchase at all            | 6     |

Table S2. The price levels of the sample.

| Price Level (US Dollar)       | Mean    | SD      |
|-------------------------------|---------|---------|
| Too Cheap Price Level         | \$6.98  | \$5.60  |
| Bargain Price Level           | \$10.85 | \$6.53  |
| Getting Expensive Price Level | \$17.47 | \$10.65 |
| Too Expensive Price Level     | \$25.90 | \$16.99 |

Table S3. Marginal effects estimates from four binary logit models summarizing the effects of sociodemographic characteristics, attention check, and reported houseplant purchasing habits influence on switching behavior between Switchers and Non-Switchers (n=2094).<sup>z</sup>

|                        |                      | Switchers and Non-Switchers |      |                                     |      |                           |      |                                     |      |
|------------------------|----------------------|-----------------------------|------|-------------------------------------|------|---------------------------|------|-------------------------------------|------|
|                        |                      | Self Purchase/<br>Bargain   |      | Self Purchase/<br>Getting Expensive |      | Gift Purchase/<br>Bargain |      | Gift Purchase/<br>Getting Expensive |      |
| Variables <sup>x</sup> |                      | dy/dx <sup>w</sup>          | SE   | dy/dx                               | SE   | dy/dx                     | SE   | dy/dx                               | SE   |
| Age                    | 18-24                | (base)                      |      |                                     |      |                           |      |                                     |      |
|                        | 25-34                | -0.07060                    | 0.05 | -0.0170                             | 0.03 | 0.0200                    | 0.05 | -0.0216                             | 0.03 |
|                        | 35-44                | <b>-0.09976</b>             | 0.05 | -0.0183                             | 0.03 | -0.0509                   | 0.05 | -0.0188                             | 0.03 |
|                        | 45-54                | <b>-0.15113</b>             | 0.05 | -0.0459                             | 0.03 | -0.1024                   | 0.05 | -0.0318                             | 0.03 |
|                        | 55-64                | <b>-0.16458</b>             | 0.05 | -0.0342                             | 0.03 | -0.0788                   | 0.05 | -0.0124                             | 0.03 |
|                        | 65-74                | <b>-0.14348</b>             | 0.05 | -0.0559                             | 0.03 | -0.0869                   | 0.05 | -0.0449                             | 0.03 |
| Gender                 | 1= Female            | 0.03103                     | 0.02 | <b>0.0590</b>                       | 0.02 | -0.0359                   | 0.02 | 0.0160                              | 0.01 |
| Attention Check        | 1=failed             | <b>0.05793</b>              | 0.02 | -0.0251                             | 0.02 | <b>0.0575</b>             | 0.02 | -0.0254                             | 0.02 |
| Income                 | < \$20k-39.9         | (base)                      |      |                                     |      |                           |      |                                     |      |
|                        | \$40k-69.9           | 0.02260                     | 0.03 | -0.0305                             | 0.02 | -0.0231                   | 0.03 | -0.0092                             | 0.02 |
|                        | \$70k-99.9           | -0.04281                    | 0.04 | -0.0222                             | 0.02 | <b>-0.0903</b>            | 0.04 | -0.0302                             | 0.02 |
|                        | > \$100k             | -0.03881                    | 0.04 | -0.0325                             | 0.02 | -0.0574                   | 0.04 | -0.0183                             | 0.02 |
| Education              | Some high school     | (base)                      |      |                                     |      |                           |      |                                     |      |
|                        | High school          | -0.00075                    | 0.07 | 0.0416                              | 0.06 | 0.0253                    | 0.07 | 0.0059                              | 0.05 |
|                        | Some college         | -0.00020                    | 0.07 | 0.0861                              | 0.06 | 0.0691                    | 0.07 | 0.0483                              | 0.05 |
|                        | Associate            | 0.01389                     | 0.08 | 0.1022                              | 0.06 | 0.0829                    | 0.08 | 0.0334                              | 0.05 |
|                        | Bachelor             | -0.01145                    | 0.08 | 0.1124                              | 0.06 | 0.0741                    | 0.08 | 0.0652                              | 0.05 |
|                        | Some graduate school | 0.11857                     | 0.10 | 0.1240                              | 0.07 | 0.1283                    | 0.10 | 0.0856                              | 0.06 |

|                        |                                  |                |      |               |      |               |      |         |      |
|------------------------|----------------------------------|----------------|------|---------------|------|---------------|------|---------|------|
| Relationship Status    | MS, PHD, Profes- sional De- gree | 0.00298        | 0.08 | 0.0834        | 0.06 | 0.0839        | 0.08 | 0.0016  | 0.06 |
|                        | Single (base)                    |                |      |               |      |               |      |         |      |
| Population Density     | In relation- ship                | -0.02927       | 0.04 | 0.0145        | 0.02 | 0.0715        | 0.04 | 0.0397  | 0.02 |
|                        | Married                          | -0.02132       | 0.03 | -0.0095       | 0.02 | 0.0228        | 0.03 | 0.0208  | 0.02 |
|                        | Divorced                         | 0.02325        | 0.04 | 0.0313        | 0.02 | 0.0246        | 0.04 | -0.0005 | 0.03 |
|                        | Widowed                          | -0.06123       | 0.06 | -0.0499       | 0.05 | -0.0256       | 0.06 | -0.0420 | 0.05 |
|                        | Metro (base)                     |                |      |               |      |               |      |         |      |
| Region                 | Suburban                         | 0.00757        | 0.03 | -0.0025       | 0.02 | 0.0164        | 0.03 | 0.0044  | 0.02 |
|                        | Small Town                       | -0.03814       | 0.04 | 0.0276        | 0.02 | -0.0140       | 0.04 | 0.0433  | 0.02 |
|                        | Rural Area                       | 0.02596        | 0.04 | 0.0048        | 0.02 | 0.0567        | 0.04 | 0.0150  | 0.02 |
|                        | Northeast (base)                 |                |      |               |      |               |      |         |      |
|                        | Mid-Atlan- tic                   | -0.07053       | 0.06 | -0.0353       | 0.04 | -0.0004       | 0.06 | -0.0036 | 0.04 |
| House Type             | South                            | -0.04431       | 0.06 | -0.0147       | 0.04 | 0.0017        | 0.06 | -0.0105 | 0.04 |
|                        | Midwest                          | -0.04147       | 0.06 | -0.0234       | 0.04 | 0.0165        | 0.06 | 0.0086  | 0.04 |
|                        | Southwest                        | 0.00221        | 0.06 | -0.0341       | 0.04 | 0.0844        | 0.06 | 0.0160  | 0.04 |
|                        | West                             | -0.00427       | 0.06 | 0.0138        | 0.04 | 0.0441        | 0.06 | 0.0226  | 0.04 |
|                        | Home (base)                      |                |      |               |      |               |      |         |      |
|                        | Town- house                      | <b>0.11921</b> | 0.05 | 0.0060        | 0.04 | <b>0.1127</b> | 0.05 | 0.0378  | 0.03 |
|                        | Condo                            | 0.08721        | 0.06 | 0.0042        | 0.04 | 0.0362        | 0.06 | 0.0133  | 0.04 |
|                        | Multi-Fam- ily Home              | 0.08593        | 0.06 | 0.0079        | 0.04 | 0.0404        | 0.06 | 0.0179  | 0.04 |
|                        | Apartment                        | 0.04565        | 0.03 | <b>0.0411</b> | 0.02 | -0.0293       | 0.03 | 0.0088  | 0.02 |
|                        | Co-op                            | 0.04212        | 0.19 | 0.0141        | 0.12 | -0.0086       | 0.19 | -0.1392 | 0.16 |
|                        | Ranch Style                      |                |      |               |      |               |      |         |      |
|                        | Home                             | 0.01711        | 0.07 | <b>0.0850</b> | 0.03 | -0.0492       | 0.07 | 0.0104  | 0.05 |
|                        | Mobile                           |                |      |               |      |               |      |         |      |
|                        | Home                             | 0.08673        | 0.05 | 0.0448        | 0.03 | 0.0131        | 0.05 | 0.0153  | 0.03 |
|                        | Other                            | 0.03361        | 0.11 | -0.0241       | 0.08 | <b>0.2309</b> | 0.09 | 0.0667  | 0.05 |
| Number of Plants Owned | None (base)                      |                |      |               |      |               |      |         |      |

|                          |                     |                |      |                |      |            |      |                |      |
|--------------------------|---------------------|----------------|------|----------------|------|------------|------|----------------|------|
| Plant Purchase Frequency | 1 plant             | 0.07599        | 0.05 | 0.0323         | 0.04 | 0.0657     | 0.05 | 0.0329         | 0.03 |
|                          | 2-5 plants          | 0.05669        | 0.05 | 0.0219         | 0.03 | 0.0779     | 0.05 | 0.0283         | 0.03 |
|                          | 6-10 plants         | 0.05221        | 0.05 | 0.0159         | 0.04 | 0.0773     | 0.05 | 0.0181         | 0.04 |
|                          | 11-15 plants        | 0.00940        | 0.07 | -0.0438        | 0.05 | 0.0029     | 0.07 | -0.0170        | 0.05 |
|                          | More than 15 plants | -0.00144       | 0.07 | -0.0069        | 0.05 | -0.0676    | 0.07 | -0.0151        | 0.05 |
|                          | Weekly (base)       |                |      |                |      |            |      |                |      |
|                          | Few Times           |                |      |                |      |            |      |                |      |
|                          | Monthly             | 0.04475        | 0.03 | 0.0146         | 0.02 | -0.0083    | 0.03 | 0.0126         | 0.02 |
|                          | Monthly             | <b>0.07635</b> | 0.04 | 0.0010         | 0.02 | 0.0172     | 0.04 | -0.0052        | 0.02 |
|                          | Few Times           |                |      |                |      |            |      |                |      |
|                          | Yearly              | 0.05612        | 0.04 | -0.0387        | 0.03 | -0.0375    | 0.04 | -0.0408        | 0.03 |
|                          | Yearly              | -0.00486       | 0.06 | <b>-0.1137</b> | 0.05 | -0.0934    | 0.06 | <b>-0.1196</b> | 0.05 |
| Log Likelihood           |                     | -1413.5053     |      | -728.4804      |      | -1401.3364 |      | -714.9900      |      |
| LR $\chi^2$              |                     | 75.57          |      | 102.37         |      | 77.49      |      | 69.33          |      |
| Prob> $\chi^2$           |                     | 0.0029         |      | 0.0000         |      | 0.0019     |      | 0.0114         |      |
| Pseudo R <sup>2</sup>    |                     | 0.0260         |      | 0.0656         |      | 0.0269     |      | 0.0462         |      |

\*Bold font indicates significance at P-values  $\leq 0.05$ .

<sup>w</sup>Marginal effects.

Table S4. Summary of sociodemographic characteristics, attention check, and reported prices influence on switching behavior for Plant Buyer treatment groups.

|                        |              | Plant Buyer Switchers and Plant Buyer Non-Switchers |             |                                     |             |                           |             |                                     |             |
|------------------------|--------------|-----------------------------------------------------|-------------|-------------------------------------|-------------|---------------------------|-------------|-------------------------------------|-------------|
|                        |              | Self-Purchase/<br>Bargain                           |             | Self-Purchase/<br>Getting Expensive |             | Gift Purchase/<br>Bargain |             | Gift Purchase/<br>Getting Expensive |             |
| Variables <sup>t</sup> |              | dy/dx <sup>s</sup>                                  | SE          | dy/dx                               | SE          | dy/dx                     | SE          | dy/dx                               | SE          |
| Age                    | 18-24        | (base)                                              |             |                                     |             |                           |             |                                     |             |
|                        | 25-34        | -0.10696                                            | 0.05        | -0.0280                             | 0.02        | -0.0256                   | 0.02        | -0.0114                             | 0.01        |
|                        | <b>35-44</b> | <b>-0.15643</b>                                     | <b>0.05</b> | -0.0068                             | 0.02        | -0.0138                   | 0.01        | -0.0067                             | 0.01        |
|                        | <b>45-54</b> | <b>-0.21276</b>                                     | <b>0.05</b> | -0.0164                             | 0.02        | <b>-0.0520</b>            | <b>0.02</b> | <b>-0.0509</b>                      | <b>0.02</b> |
|                        | <b>55-64</b> | <b>-0.22770</b>                                     | <b>0.05</b> | -0.0078                             | 0.02        | <b>-0.0384</b>            | <b>0.02</b> | -0.0284                             | 0.02        |
|                        | <b>65-74</b> | <b>-0.21248</b>                                     | <b>0.05</b> | -0.0501                             | 0.02        | <b>-0.0492</b>            | <b>0.02</b> | -0.0332                             | 0.02        |
| Gender                 | 1 = Female   | 0.00343                                             | 0.02        | <b>0.0119</b>                       | <b>0.01</b> | -0.0163                   | 0.01        | -0.0170                             | 0.01        |
| Attention Check        | 1 = failed   | 0.03972                                             | 0.02        | -0.0043                             | 0.01        | -0.0081                   | 0.01        | -0.0039                             | 0.01        |
| Income                 | < \$20k-39.9 | (base)                                              |             |                                     |             |                           |             |                                     |             |
|                        | \$40k-69.9   | 0.03422                                             | 0.03        | 0.0208                              | 0.01        | -0.0067                   | 0.01        | 0.0066                              | 0.01        |
|                        | \$70k-99.9   | -0.02946                                            | 0.04        | <b>0.0345</b>                       | <b>0.02</b> | 0.0074                    | 0.02        | 0.0079                              | 0.01        |
|                        | > \$100k     | -0.03653                                            | 0.04        | <b>0.0399</b>                       | <b>0.02</b> | -0.0079                   | 0.02        | -0.0104                             | 0.02        |

|                     |                       |                |             |               |             |         |      |         |      |
|---------------------|-----------------------|----------------|-------------|---------------|-------------|---------|------|---------|------|
| Education Level     | Some high school      | (base)         |             |               |             |         |      |         |      |
|                     | High school           | -0.00794       | 0.08        | -0.0214       | 0.03        | 0.0967  | 0.07 | 0.0283  | 0.05 |
|                     | Some college          | -0.02987       | 0.08        | -0.0115       | 0.03        | 0.0969  | 0.07 | 0.0272  | 0.05 |
|                     | Associate             | -0.04386       | 0.08        | -0.0346       | 0.03        | 0.1030  | 0.07 | 0.0287  | 0.05 |
|                     | Bachelor              | -0.05232       | 0.08        | -0.0262       | 0.03        | 0.1029  | 0.07 | 0.0379  | 0.05 |
|                     | Some graduate school  | 0.03032        | 0.11        | -0.0287       | 0.05        | 0.1179  | 0.07 |         |      |
|                     | MS, PHD, Professional |                |             |               |             |         |      |         |      |
|                     | Degree                | -0.01398       | 0.09        | -0.0372       | 0.03        | 0.0780  | 0.07 | 0.0247  | 0.05 |
| Relationship Status | Single                | (base)         |             |               |             |         |      |         |      |
|                     | In relationship       | 0.02004        | 0.04        | <b>0.0352</b> | <b>0.02</b> | 0.0158  | 0.02 | 0.0100  | 0.02 |
|                     | Married               | 0.00530        | 0.03        | 0.0193        | 0.02        | 0.0245  | 0.02 | 0.0108  | 0.02 |
|                     | Divorced              | -0.01810       | 0.04        | 0.0038        | 0.02        | 0.0221  | 0.02 | 0.0236  | 0.02 |
|                     | Widowed               | -0.05329       | 0.06        | 0.0295        | 0.02        | 0.0306  | 0.02 | 0.0247  | 0.02 |
|                     |                       |                |             |               |             |         |      |         |      |
| Population Density  | Metro                 | (base)         |             |               |             |         |      |         |      |
|                     | Suburban              | 0.03601        | 0.03        | 0.0093        | 0.01        | 0.0040  | 0.01 | 0.0066  | 0.01 |
|                     | Small Town            | -0.03633       | 0.04        | -0.0034       | 0.02        | 0.0210  | 0.02 | 0.0089  | 0.02 |
|                     | Rural Area            | 0.03055        | 0.04        | -0.0042       | 0.02        | 0.0164  | 0.02 | 0.0128  | 0.02 |
| Region              | Northeast             | (base)         |             |               |             |         |      |         |      |
|                     | Mid-Atlantic          | -0.03655       | 0.06        | -0.0328       | 0.03        | 0.0041  | 0.03 | 0.0131  | 0.03 |
|                     | South                 | -0.03569       | 0.06        | -0.0147       | 0.02        | 0.0070  | 0.03 | 0.0148  | 0.03 |
|                     | Midwest               | -0.01655       | 0.06        | -0.0211       | 0.02        | 0.0143  | 0.03 | 0.0260  | 0.03 |
|                     | Southwest             | 0.04092        | 0.06        | -0.0090       | 0.03        | 0.0132  | 0.03 | 0.0258  | 0.03 |
|                     | West                  | -0.02573       | 0.06        | -0.0210       | 0.03        | -0.0141 | 0.03 | -0.0125 | 0.03 |
| House Type          | Home                  | (base)         |             |               |             |         |      |         |      |
|                     | Townhouse             | <b>0.12018</b> | <b>0.05</b> | <b>0.0496</b> | <b>0.01</b> | 0.0179  | 0.02 | 0.0121  | 0.02 |
|                     | Condo                 | 0.07853        | 0.07        | 0.0052        | 0.03        | 0.0021  | 0.02 | -0.0082 | 0.03 |
|                     | Multi-Family          |                |             |               |             |         |      |         |      |
|                     | Home                  | 0.07418        | 0.06        |               |             | -0.0558 | 0.04 | -0.0271 | 0.04 |
|                     | Apartment             | 0.02395        | 0.03        | 0.0173        | 0.01        | -0.0093 | 0.01 | -0.0042 | 0.01 |
|                     | Co-op                 | 0.19699        | 0.20        |               |             | -0.2428 | 0.21 | -0.2622 | 0.22 |
|                     | Ranch Style           |                |             |               |             |         |      |         |      |
|                     | Home                  | 0.00610        | 0.07        | -0.0022       | 0.04        | -0.0799 | 0.05 | -0.0859 | 0.05 |
|                     | Mobile Home           | 0.07985        | 0.05        | <b>0.0467</b> | <b>0.01</b> | -0.0176 | 0.03 | -0.0158 | 0.02 |

|                             |              |                |             |               |      |               |      |               |      |
|-----------------------------|--------------|----------------|-------------|---------------|------|---------------|------|---------------|------|
|                             | Other        | -0.08569       | 0.12        | .             | .    | -0.0425       | 0.06 | -0.0411       | 0.05 |
| Number of<br>Plants Owned   | None         | (base)         |             |               |      |               |      |               |      |
|                             | 1 plant      | 0.03787        | 0.05        | 0.0196        | 0.02 | 0.0297        | 0.03 | 0.0392        | 0.03 |
|                             | 2-5 plants   | -0.00705       | 0.05        | 0.0131        | 0.02 | 0.0338        | 0.03 | 0.0464        | 0.03 |
|                             | 6-10 plants  | 0.02856        | 0.05        | -0.0037       | 0.03 | 0.0297        | 0.03 | 0.0424        | 0.03 |
|                             | 11-15 plants | 0.02569        | 0.07        | 0.0470        | 0.03 | 0.0129        | 0.04 | 0.0425        | 0.03 |
|                             | More than 15 |                |             |               |      |               |      |               |      |
|                             | plants       | 0.00974        | 0.07        | 0.0295        | 0.03 | <b>0.0670</b> | 0.03 | 0.0703        | 0.03 |
| Plant Purchase<br>Frequency | Weekly       | (base)         |             |               |      |               |      |               |      |
|                             | Few Times    |                |             |               |      |               |      |               |      |
|                             | Monthly      | 0.05823        | 0.03        | <b>0.0483</b> | 0.02 | <b>0.0271</b> | 0.02 | 0.0175        | 0.01 |
|                             | Monthly      | <b>0.08649</b> | <b>0.04</b> | <b>0.0595</b> | 0.02 | 0.0302        | 0.02 | 0.0201        | 0.02 |
|                             | Few Times    |                |             |               |      |               |      |               |      |
|                             | Yearly       | <b>0.08778</b> | <b>0.04</b> | <b>0.0665</b> | 0.02 | <b>0.0415</b> | 0.02 | <b>0.0324</b> | 0.02 |
|                             | Yearly       | 0.02654        | 0.06        | .             | .    | .             | .    | .             | .    |
| Log Likelihood              |              | -1251.6584     |             | -260.5537     |      | -324.2552     |      | -273.8706     |      |
| LR $\chi^2$                 |              | 85.19          |             | 68.24         |      | 54.32         |      | 53.80         |      |
| Prob> $\chi^2$              |              | 0.0003         |             | 0.0035        |      | 0.1370        |      | 0.1250        |      |
| Pseudo R <sup>2</sup>       |              | 0.0329         |             | 0.1158        |      | 0.0773        |      | 0.0894        |      |

<sup>a</sup>Bold font indicates significance with P-values  $\leq 0.05$ .

<sup>a</sup>Marginal effects.
